# Supplementary material for: Development of Post-Stroke Cognitive and Depressive Disturbances: Associations with Neurohumoral Indices
Source: MDPI journal article supplement (doi:10.3390/cimb44120429), 2022-12-11
Supplement: s1 [file s1]

## Supplementary material

### Development of Post-Stroke Cognitive and Depressive Disturbances: Associations with Neurohumoral Indices

Authors: Marina Y. Zhanina, Tatyana A. Druzhkova, Alexander A. Yakovlev, Elena E. Vladimirova, Sofia V. Freiman, Natalia N. Eremina, Alla B. Guekht and Natalia V. Gulyaeva

**Table S1.** Characteristics of patients with and without cognitive impairment.

| Parameters                                          | Patients with PSCI | Patients without PSCI | <i>p</i> -value |
|-----------------------------------------------------|--------------------|-----------------------|-----------------|
| Gender (male/female), n                             | 12/4               | 15/2                  | 0.30            |
| Age ( $M \pm \sigma$ ), years                       | 58 $\pm$ 12        | 53 $\pm$ 9            | 0.25            |
| Education (middle/higher), %                        | 87.5/12.5          | 64.7/35.3             | 0.13            |
| Dyslipidemia, %                                     | 12.5               | 23.5                  | 0.36            |
| Arrhythmia, %                                       | 25                 | 0                     | 0.05            |
| Diabetes, %                                         | 6                  | 12                    | 0.52            |
| Smoking, %                                          | 44                 | 47                    | 0.56            |
| Localization of IS in the middle cerebral artery, % | 81                 | 59                    | 0.15            |
| Lateralization of IS (right/left), %                | 50/50              | 70.6/29.4             | 0.20            |
| NIHSS ( $M \pm \sigma$ ), points                    | 2.2 $\pm$ 2.0      | 1.8 $\pm$ 1.5         | 0.50            |
| HAM scale ( $M \pm \sigma$ ), points                | 6.0 $\pm$ 5.5      | 3.0 $\pm$ 3.5         | 0.06            |
| BDI scale ( $M \pm \sigma$ ), points                | 6.4 $\pm$ 5.0      | 4.8 $\pm$ 4.2         | 0.30            |
| HADS scale ( $M \pm \sigma$ ), points               | 4.4 $\pm$ 3.5      | 3 $\pm$ 2.8           | 0.20            |
| MoCA scale ( $M \pm \sigma$ ), points               | 23.3 $\pm$ 4       | 27.6 $\pm$ 2.0        | 0.0004***       |
| SRRS scale ( $M \pm \sigma$ ), points               | 150.4 $\pm$ 55.6   | 179.3 $\pm$ 89.5      | 0.96            |
| PSS ( $M \pm \sigma$ ), points                      | 34.8 $\pm$ 9.0     | 29.8 $\pm$ 9.3        | 0.13            |
| mRS ( $M \pm \sigma$ ), points                      | 0.5 $\pm$ 0.5      | 0.1 $\pm$ 0.3         | 0.02*           |
| ADL scale ( $M \pm \sigma$ ), points                | 99.4 $\pm$ 1.7     | 99.4 $\pm$ 1.7        | 1.00            |

Data of all psychometric and neurological scales are presented for the 30th day after IS, except of the SRRS, for which the data are presented for 180th day after SI. \*\*\* $p < 0.001$ .

**Table S2.** Characteristics of patients with and without depressive disorder.

| Parameters                                           | Patients with PSDD | Patients without PSDD | <i>p</i> -value |
|------------------------------------------------------|--------------------|-----------------------|-----------------|
| Gender (male/female), n                              | 8/2                | 19/4                  | 0.60            |
| Age ( $M \pm \sigma$ ), years                        | 61 $\pm$ 7.2       | 54 $\pm$ 7            | 0.20            |
| Education (middle/higher), %                         | 60/40              | 74/26                 | 0.34            |
| Dyslipidemia, %                                      | 30                 | 17.4                  | 0.40            |
| Arrhythmia, %                                        | 30                 | 4.4                   | 0.07            |
| Diabetes, %                                          | 10                 | 8.7                   | 0.66            |
| Smoking, %                                           | 40                 | 48                    | 0.49            |
| Stroke localization in the middle cerebral artery, % | 80                 | 65                    | 0.34            |
| Stroke lateralization (right/left), %                | 40/60              | 70/30                 | 0.11            |
| NIHSS scale ( $M \pm \sigma$ ), points               | 2.1 $\pm$ 2.0      | 2.0 $\pm$ 2.0         | 0.50            |
| HAM scale ( $M \pm \sigma$ ), points                 | 8.7 $\pm$ 6.0      | 2.7 $\pm$ 3.0         | 0.0003***       |

|                          |             |            |             |
|--------------------------|-------------|------------|-------------|
| BDI scale (M±σ), points  | 10.2±4.0    | 3.5±3.0    | 0.000007*** |
| HADS scale (M±σ), points | 6.8±2.3     | 2.3±2.5    | 0.00004**** |
| MoCA scale (M±σ), points | 25±5.0      | 26±3.4     | 0.70        |
| SRRS scale (M±σ), points | 192.7±101.5 | 152.1±57.3 | 0.20        |
| PSS scale (M±σ), points  | 38.0±7.0    | 30.0±9.3   | 0.02*       |
| mRS scale (M±σ), points  | 0.6±0.5     | 0.2±0.4    | 0.01*       |
| ADL scale (M±σ), points  | 99.0±2.1    | 99.6±1.4   | 0.40        |

Data of all psychometric and neurological scales are presented for the 30th day after IS, except of the SRRS, for which the data are presented for 180th day after SI. \*\*\* $p<0.001$ , \*\*\*\* $p<0.0001$ .

**Table S3.** The input variables in the model that were recognized as being significant predictors of post-stroke cognitive decline in multiple logistic regression analysis.

|                                        | B         | SE      | <i>p</i> -Value | OR   | 95% CI    |
|----------------------------------------|-----------|---------|-----------------|------|-----------|
| Model of post-stroke cognitive decline |           |         |                 |      |           |
| Age                                    | 0.12127   | 0.05564 | 0.0293          | 1.13 | 1.02–1.28 |
| Cortisol in saliva,<br>day 1           | 0.34788   | 0.14766 | 0.0185          | 1.42 | 1.11–1.99 |
| Constant                               | –10.74099 | 4.30531 | 0.0126          | 0.02 | -         |

R square of post-stroke cognitive decline = 0.73. B, unstandardized regression coefficient; CI, confidence interval; SE, standard error, OR, odds ratio.
